# Supplementary material
Source: publisher site journal article supplement (https://www.dovepress.com/article/187567)
Supplement: Supplementary file 1 [file get_supplementary_file.php]

**Supplementary materials**

**METHODS**

**Measurements**

**DIsability RElated to COPD Tool (DIRECT questionnaire)**

Your doctor has asked you to fill out this questionnaire because your breath measurement indicates abnormalities corresponding to a chronic respiratory disease called COPD (which you may know as chronic bronchitis). These breathing problems may bother you in your daily life. This questionnaire will allow your doctor to better monitor your health.

To complete this questionnaire, think about your different daily activities and how you usually go about them.

Because of your breathlessness

1. Does it ever bother you to talk and discuss things?

0 1 2 3

Never Sometimes Often All of the time

Because of your breathlessness

2. Do you have trouble washing up or dressing?

0 1 2 3

Never Sometimes Often All of the time

Because of your breathlessness

3. Do you ever have trouble running small errands?

0 1 2 3 4 0

Never Sometimes Often All of the time I'm no longer able to do this. I am not the one who does the errands.

Because of your breathlessness

4. Do you ever have trouble doing housework or do-it-yourself projects in the house?

0 1 2 3 4 0

Never Sometimes Often All of the time I'm no longer able to do this. I do not do housework or do-it-yourself projects.

Because of your breathlessness

5. Do you ever have trouble going places on foot?

0 1 2 3 4

Never Sometimes Often All of the time I'm no longer able to do this.

Because of your breathlessness

6. Do you ever have trouble climbing stairs?

0 1 2 3 4

Never Sometimes Often All of the time I'm no longer able to do this.

7. Do your breathing problems limit what you like to do during your daily life?

0 1 2 3

Never Sometimes Often All of the time

8. Do your breathing problems limit your relationships with others (in your daily life or

at work)?

0 1 2 3

Never Sometimes Often All of the time

9. Do you have to rely on others to perform certain tasks because of your breathing

problems?

0 1 2 3

Never Sometimes Often All of the time

10. Do you have to rest during the day because of your breathing problems?

0 1 2 3

Never Sometimes Often All of the time

SUM THE SCORE OBTAINED FOR EACH QUESTION TO HAVE THE TOTAL SCORE

[score range going from 0 (no disability) to a maximum of 34 (high level of disability)]

QUESTIONS 11 & 12 ARE NOT INCLUDED IN THE TOTAL SCORE BUT MIGHT BE USEFUL FOR DISCUSSION BETWEEN THE PATIENT AND THE PHYSICIAN:

11. Are you limited by your breathing problems in your sexual relationships?

Never Sometimes Often All of the time I'm no longer able to do this. I am not sexually active.

12. Are your breathing problems a disability for you in everyday life?

Never Sometimes Often All of the time

THANK YOU FOR YOUR COOPERATION.

**Specific characteristics of the 3-minute Chair Rise Test (3-min CRT) protocol**

During the first minute, patients were guided by a practitioner to perform 20 repetitions (12 for patients with FEV1 <1000 mL and/or very low physical capacity) with a rhythm set by the practitioner. They were then asked to perform as many repetitions as possible during the last 2 min.

Detailed instructions:

*“The exercise is to stand and sit during 3 minutes. Throughout the test you must keep your hands on your hips or on your chest. I’ll give you the rhythm during the first minute by a simple verbal order: “sit”, “stand” (or by doing the sit-to-stand with you). During the last 2 minutes you will try to rise and sit as many times as possible. I will tell you the remaining time verbally: “only another minute and 30 seconds”, “only another minute”, “only another 30 seconds”. At any time, you can slow down or speed up. If the exercise is too difficult, you can also stop and start again. If you decide to stop the test, I will tell you the remaining time each 15 seconds: “only 1 minute and 15 seconds”, “only 1 minute”, “only 45 seconds etc.…until the end of the third minute. You can also decide to permanently stop the test before the end of 3 minutes if you feel too tired or breathless.”*

**RESULTS**

**SUPPLEMENTARY TABLE S1. Robust linear correlation coefficients (Donoho–Stahel estimator) for the change in all values of all tools tested after pulmonary rehabilitation of COPD patients.**

| **Tools** | **SGRQ S.** | **SGRQ A.** | **SGRQ I.** | **SGRQ T.** | **CAT** | **DIRECT** | **6MWT** | **3-min CRT** | **1-min STST** | **5STST** |
| --- | --- | --- | --- | --- | --- | --- | --- | --- | --- | --- |
| **SGRQ S.** | 1.00 | 0.11 | 0.25 | 0.47 | 0.19 | 0.24 | 0.07 | 0.20 | 0.17 | 0.41 |
| **SGRQ A.** | 0.11 | 1.00 | 0.37 | 0.88 | 0.33 | 0.30 | 0.05 | 0.09 | 0.13 | 0.00 |
| **SGRQ I.** | 0.25 | 0.37 | 1.00 | 0.80 | 0.32 | 0.30 | 0.33 | 0.21 | 0.34 | 0.45 |
| **SGRQ T.** | 0.47 | 0.88 | 0.80 | 1.00 | 0.45 | 0.25 | 0.02 | **0.40** | 0.29 | 0.21 |
| **CAT** | 0.19 | 0.33 | 0.32 | 0.45 | 1.00 | **0.56** | 0.33 | 0.04 | 0.32 | 0.07 |
| **DIRECT** | 0.24 | 0.30 | 0.30 | 0.25 | 0.56 | 1.00 | 0.24 | 0.14 | 0.43 | 0.39 |
| **6MWT** | 0.07 | 0.05 | 0.33 | 0.02 | 0.33 | 0.24 | 1.00 | 0.13 | 0.30 | 0.15 |
| **3-min CRT** | 0.20 | 0.09 | 0.21 | 0.40 | 0.04 | 0.14 | 0.13 | 1.00 | 0.51 | 0.33 |
| **1-min STST** | 0.17 | 0.13 | 0.34 | 0.29 | 0.32 | **0.43** | 0.30 | **0.51** | 1.00 | 0.09 |
| **5STST** | 0.41 | 0.00 | 0.45 | 0.21 | 0.07 | 0.39 | 0.15 | 0.33 | 0.09 | 1.00 |

Numbers in bold indicate correlation coefficients of the anchors for the DIRECT questionnaire and 3-min CRT (Table 2 and supplementary table S2). BODE: Body mass index-obstruction-dyspnoea-exercise index; SGRQ: St. George’s Respiratory Questionnaire; S: symptoms; A: activity; I: impact; T: total; CAT: COPD Assessment Test; DIRECT: Disability Related to COPD Tool; 6MWT: 6-minute walk test; 3-min CRT: 3-minute chair rise test; 1-min STST: 1-minute sit-to-stand test; 5STST: 5-repetition sit-to-stand-test.

**SUPPLEMENTARY TABLE S2. Robust linear correlation coefficients (Donoho–Stahel estimator) for the change in values for DIRECT questionnaire and 3-min CRT anchors after pulmonary rehabilitation of COPD patients stratified by BODE score.**

| **Tool** | **Anchors** | **All patients** | **BODE 0–2** | **BODE 3–4** |
| --- | --- | --- | --- | --- |
| **DIRECT** | CAT | 0.56 | 0.75 | 0.75 |
| 1-min STST | 0.43 | 0.87 | 0.87 |
| **3-min CRT** | SGRQ | 0.40 | 0.66 | 0.66 |
| 1-min STST | 0.51 | 0.40 | 0.40 |

The BODE 5–7 population was too small to establish a reliable correlation. BODE: Body mass index-obstruction-dyspnoea-exercise index; DIRECT: Disability Related to COPD Tool; CAT: COPD Assessment Test; 1-min STST: 1-minute sit-to-stand test; 3-min CRT: 3-minute chair rise test; SGRQ: St. George’s Respiratory Questionnaire.
